# Supplementary material for: Differences in pollination success between local and foreign flower color phenotypes: a translocation experiment with Gentiana lutea (Gentianaceae)
Source: PeerJ. 2017 Feb 7;5:e2882. doi: 10.7717/peerj.2882 (PMC5299997; doi:10.7717/peerj.2882)
Supplement: Data S2 [file peerj-05-2882-s002.xlsx]

## Sheet: "data not shown"
	Population&Treatment	% number of visits
	Pontón control	50.93
	Pontón trans-local	39.28
	Ponton trans-foreign	41
	Ancares control	46.87
	Ancares trans-foreign	24.73
	Ancares trans-local	32.53
		Total no. of visits per bumblebee group
	Population&Treatment	Group 1	Group 2	Group 3	Group 4	Group 5	Group 6	Group 7	Group 8
	Pontón control	225	4	481	2	10	6	0	36
	Pontón trans-local	187	10	284	29	7		0	27
	Ponton trans-foreign	260	7	88	17			0	38
	Ancares control	35	27	332	110	21	2	221	0
	Ancares trans-foreign	77	3	101	39	1		149	0
	Ancares trans-local	22	12	237	60	16		75	0
